## RETRACTION

# Retraction: Transdermal Delivery of Insulin by Amidated Pectin Hydrogel Matrix Patch in Streptozotocin-Induced Diabetic Rats: Effects on Some Selected Metabolic Parameters

The *PLOS ONE* Editors

Following the publication of this article [1], concerns were raised regarding results presented in Figs 1 and 6. Specifically,

- Fig. 1B partially overlaps with Fig. 1D.
- In Fig. 6, the following bands appear similar:
  - Left  $\beta$ -actin panel: lanes 1 and 8, and lane 5 when flipped.
  - Left  $\beta$ -actin panel: lanes 2 and 6 when flipped.
  - Left  $\beta$ -actin panel: lanes 3 and 4, and lane 7 when flipped.
  - Right  $\beta$ -actin panel: lanes 1 and 3.
- In the Fig. 6 GS panel, left  $\beta$ -actin panel and right  $\beta$ -actin panel irregularities have been detected between the background signal directly surrounding the bands in all lanes and the overall background signal of the blot.

The original data for the figures of concern are no longer available.

In light of the concerns affecting multiple figure panels that question the integrity of these data, the *PLOS ONE* Editors retract this article.

SIH, PSN, and MRS either did not respond directly or could not be reached. CTM is deceased.

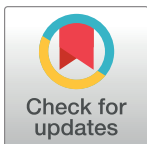

## OPEN ACCESS

**Citation:** The *PLOS ONE* Editors (2021) Retraction: Transdermal Delivery of Insulin by Amidated Pectin Hydrogel Matrix Patch in Streptozotocin-Induced Diabetic Rats: Effects on Some Selected Metabolic Parameters. *PLoS ONE* 16(2): e0247150. <https://doi.org/10.1371/journal.pone.0247150>

**Published:** February 11, 2021

**Copyright:** © 2021 The *PLOS ONE* Editors. This is an open access article distributed under the terms of the [Creative Commons Attribution License](https://creativecommons.org/licenses/by/4.0/), which permits unrestricted use, distribution, and reproduction in any medium, provided the original author and source are credited.

## Reference

1. Hadebe SI, Ngubane PS, Serumula MR, Musabayane CT (2014) Transdermal Delivery of Insulin by Amidated Pectin Hydrogel Matrix Patch in Streptozotocin-Induced Diabetic Rats: Effects on Some Selected Metabolic Parameters. *PLoS ONE* 9(7): e101461. <https://doi.org/10.1371/journal.pone.0101461> PMID: [24987850](https://pubmed.ncbi.nlm.nih.gov/24987850/)
